# Supplementary material for: The effect of folic acid, protein energy and multiple micronutrient supplements in pregnancy on stillbirths
Source: BMC Public Health. 2011 Apr 13;11(Suppl 3):S4. doi: 10.1186/1471-2458-11-S3-S4 (PMC3231910; doi:10.1186/1471-2458-11-S3-S4)
Supplement: Additional File 2 — Data extraction sheet for studies included in the review [file 1471-2458-11-S3-S4-S2.xlsx]

## Sheet: Rules
Rules for estimating effectiveness value
Rule 0 There must be a total of 50? events (whether mortality, or severe morbidity or morbidity) before we consider we have any data on this outcome suitable for inclusion in the calculation. (Should be in Table 2 and can contribute to expert opinion)
Rule 1 If you have no evidence on effect on cause specific mortality but you do have evidence of effect on all-cause mortality Then translate all-cause into cause-specific, adjust level of quality assessment (see below)
Rule for adjustment for all-cause to cause-specific mortality data If we have evidence on all-cause mortality this needs to be translated into cause-specific and then it is used in the three rules below. But assessment of the quality of evidence is dropped one level before it is applied, e.g., good all-cause mortality becomes moderate cause-specific. High=>moderate, Moderate=>poor; Poor=> Very Po…
Rule 2 If there is high or moderate evidence of reduction in cause-specific mortality effect, Then use the mortality effect Issues for Rule 2 What is the comparison arm and does this reflect practice/conditions in the settings we are interested in? Do we deal with this? We should at least note the comparison group and we will have a more conservative estimate of effectiveness.
Rule 3 If there is low quality of evidence (or very low quality) of evidence of reduction in cause-specific mortality And there is high or moderate quality of evidence of serious morbidity effect (in the same direction) Then use the smaller of the two effects Issues for 3 What is the comparison arm and does this reflect practice/conditions in the settings we are interested in? This implies you ha…
Rule 4 If there is low (or very low quality) of evidence of a reduction in cause-specific mortality And if there is low (or very low quality) evidence of serious morbidity reduction And if there is high or moderate evidence of mild morbidity reduction Then take the smallest of the three effects Issues for 4 Usually these would be treatment studies where one compares deaths rates among treatment a…
Rule 5 And if there are high quality data on most serious morbidity Then use this value as the estimate
Rule 6 If there are moderate or low or very low quality data on serious morbidity And high or moderate quality data on mild/moderate morbidity Then take the smaller of the two effects If there is no evidence for mortality or serious morbidity (i.e. data on < 50 events)
Rule 7 If there are high quality data on mild/moderate morbidity Then use the value of the most severe value as the estimate Issues for Rules 5, 6 and 7 We may want to have an adjustment that is applied to this for the best estimate. This would be based on an analysis of the table 2 findings for all of the interventions If there is not sufficient evidence on mortality, serious morbidity or high q…
Expert process If you do not have evidence that meets the conditions of rules 0-7 above, And there is a clear and obvious clinic benefit, Then use expert judgment of effectiveness based on the following guidance To generate expert opinion: Use a wide group of “appropriate” experts (worked in multiple settings, developing country experience, public health experience, epidemiological expertise, etc…
For Table 2 For meta analysis for values in Table 2 (one for each category of studies) 1. Run a meta analysis 2. Check for heterogeneity 3. If there is heterogeneity, look to see what explains it (visual inspection, stratified analysis and meta regression). 4. As last resort, do a random effects model For plausibility bounds When there is a direct estimate of cause-specific mortality, take the st…

## Sheet: Table1
																							(optional column)	(optional column)
KICK searches and study abstract summary	STUDY IDENTIFIERS AND CONTEXT										STUDY DESIGN AND LIMITATIONS														INTERVENTION						OUTCOME EFFECTS
ABSTRACTED REFS												RUT (HIGH SCORE)			If cluster RCT		ALL FOLLOW UP STUDIES (RCT cRCT or Cohort)	QUASI EXPERIMENTAL (MODERATE) OBSERVATIONAL (LOW)				BEFORE/AFTER DESIGN (LOW TO VERY LOW)
Include in new meta	INTERVENTION study code	Author	Year of publication	Journal ref	Years of study	Country	Place in country	Urban or rural or mixed or unclear	Baseline/control mortality rate	Setting	Study design - randomized?	Allocation concealed? (adequate randomization)	Assessment blinded?	Intent to treat analysis?	Cluster RCT results adjusted for clustering?	If cluster RCT are there more than 12 units for analysis? (specify number)	Minimal loss to follow up? (more than 20% is serious limitation)	Is cohort or nested case control study?	If quasi experimental are there more than 12 units for analysis? (specify number)	Adjustment for confounding?	Reverse causality is not a serious issue?	Not before/after design? (if so then always low or very low)	In Cochrane?	Reason for exclusion from Cochrane?	Target population for the intervention (age, case defn)	Intervention definition	Other intervention at the same time	Coverage of the intervention (comment on quality)	Was the intervention delivered through the routine health system?	Comparison group (eg routine care and what this involved)	Outcome definition (eg deaths under five, deaths to 28 days, morbidity)	Intervention/endline numerator	Intervention/endline denominator	Control/baseline numerator	Control/baseline denominator	Effect on outcome (intervention compared to control gp) % reduction	CI	p-value	OVERALL STUDY LIMITATIONS?	Comments
	Effect of Balanced protein energy Supplementation on stillbirths
Include		Ceesay	1997	BMJ 1997; 315 :786-90	Oct 1989 to Oct 1994	Gambia	West Kiang region	Rural	Not Given	Community	Cluster Randomization	Unclear	Unclear	Yes	Yes	No	0.22	Not applicable	Not applicable	Not applicable	Not applicable	Not applicable	Yes		All women of childbearing age (15-45 yrs) were recruited from villages included in the study.	Two Supplement biscuit containing roasted groundnuts, rice flour, sugar and groundnut oil consumed daily in the presence of birth attendant. The supplement started from 20 weeks of gestation up to term.	No		No	The control pregnant mothers received no supplementation	Stillbirths	7	652	13	545	0.45	0.18-1.12		Randomization by cluster (village), but effects reported for individual births, based on multilevel (3-stage random effects) modeling with separate error terms for village, mother, and (for mothers with more than one pregnancy during study) baby.	Gestational age was assessed by the Parkin method (simplified Dubowitz procedure) which scores four external characteristics : skin color, skin texture, ear firmness and breast development. Stillbirths were recorded by the birth attendants and cross checked by the study fieldworkers and the mobile midwives. Infant deaths were recorded by a government-appointed village recorder and cross checked b…
Include		Mora	1978	Nutrition Reports International 1978; 17: 217-28	Not given	USA	Columbia	Rural	Not Given	Community	Quasi-RCT	Inadequate	No	Yes	Not applicable	Not applicable	Not given	Not applicable	Not applicable	Not applicable	Not applicable	Not applicable	Yes		Poor first or second trimester women whose previous child had weight for height < 85%.	Experimental group received supplement containing 865 kcal energy and 38.4g protein beginning in 3rd trimester;	No		Yes	The control pregnant mothers received no supplementation	Stillbirths	2	221	8	222	0.25	0.05-1.17		Allocation method not reported; compliance assessed but data not presented; substitution assessed by single 24-hour recall 8 weeks after starting supplemented
JUDITH LOOKS LIKE NO MORT OR MORB OUTCOMES/??		Rush	1980	Pediatrics 1980; 65: 683-697	Mid 1969 to 1976	United States Of America	New York	Rural	Not given	Community	Randomized	Adequate	Yes	Yes	Not applicable	Not applicable	0.25	Not applicable	Not applicable	Not applicable	Not applicable	Not applicable	Yes		Poor Black, English speaking women who have not exceeded 30 weeks of gestation at the interview	The intervention group received supplement containing 322 kcal energy, 6g protein, and vitamins/minerals;	No		Yes	Control group got supplementation with only vitamins and minerals	Stillbirths	9	270	10	276	0.92	0.38-2.23		Little data presented on the ~ 25% of subjects who failed to comply, dropped out or moved away; stratified randomization based on table of random numbers
	Effect of Multiple Micronutrient Supplementation on Stillbirth
		Christian P, et al.	2003	BMJ 326: 571	December 1998 to the end of April 2001	Nepal	South eastern plains district of Sarlahi	Rural	Not given	Community	Double blind cluster randomized controlled trial	Yes, adequate	Yes, double-blind. The participants, providers and assessors were blinded to the drug regimens	Yes	Cluster RCT, but results not adjusted for clustering	426 communities were randomized	< 5%	Not applicable	Not applicable	Not applicable	Not applicable	Not applicable	Yes		All women of reproductive age group	The intervention group comprised of folic acid 400 µg, iron 60 mg as ferrous fumerate, vitamin A, 30 mg of zinc as zinc sulphate plus vitamin D 10 µg, vitamin E 10 mg, vitamin B1 1.6 mg, vitamin B2 1.8 mg, niacin 20 mg, vitamin B6 2.2 mg, vitamin B12 2.6 µg, vitamin C 100 mg, vitamin K 65 µg, copper 2 mg and magnesium 100 mg.	None	Not mentioned	Yes	The comparison group was folic acid 400 µg, iron 60 mg as ferrous sulphate and 1000 µg vitamin A	Stillbirths	Generic inverse variance				1.47	0.94 - 2.31	Efficacy	None in particular
	-	Fawzi WW, et al.	2007	N Engl J Med 356: 1423-31	Recruitment between August 2001 and July 2004	Tanzania	Dar es Salaam	Not clear	LBW rate: 13% in the general population	Antenatal clinics	Yes, randomized	Yes, probably done	Participants, care givers and outcome assessors were blinded to the treatment assignment	Yes	Not a cluster RCT	Not a cluster RCT	Exclusion (0.47%) and attrition (5.4%) was reported	Not applicable	Not applicable	Not applicable	Not applicable	Not applicable	No	Later study	Pregnant women attending antenatal clinics and being negative for HIV infection, planning to stay in the city until delivery and for 1 year thereafter, and an estimated gestational age between 12 and 27 weeks, according to the LMP	Multivitamin supplement from enrollment until 6 weeks after delivery. The supplement included 20 mg of vitamin B1, 20 mg of vitamin B2, 25 mg of vitamin B6, 100 mg of niacin, 50 µg of vitamin B12, 500 mg of vitamin C, 30 mg of vitamin E, and 0.8 mg of folic acid. All women received 60 mg of elemental iron and 0.25 mg folic acid, and were also given malaria prophylaxis in the form of sulfadoxine-p…	None	Not mentioned	Yes	The comparison group received a placebo from the time of enrollment until 6 weeks after delivery. All women received 60 mg of elemental iron and 0.25 mg folic acid, and were also given malaria prophylaxis in the form of sulfadoxine-pyrimethamine tablets at 20 and 30 weeks of gestation	Stillbirths	180	4191	209	4188	0.87	0.72 - 1.05	Effectiveness	The study results may not be generalizable to population of women for whom prenatal care is less available.
		Friis H, et al.	2004	Am J Clin Nutr 80: 178-84	1996-1997	Zimbabwe	Mbare residential area of Harare	Urban	Not given	Women presenting for antenatal care at the Edith Oppermann Maternity Hospital (EOMH)	Simple block randomization	Yes, adequate	Double-blind trial: the study participants and the providers were blinded but blinding of investigators is unclear	Yes	Not a cluster RCT	Not a cluster RCT	More than 20%	Not applicable	Not applicable	Not applicable	Not applicable	Not applicable	Yes		Pregnant women between 22 and 36 wk of gestation registering for antenatal care at the hospital (only HIV-uninfected women considered in our analysis)	The intervention group received multiple micronutrient supplementation of vitamin A 3000 mcg RE, beta carotene 3.5 mg, thiamine 1.5 mg, riboflavin 1.6 mg, B6 2.2 mg, B12 4 mcg, niacin 17 mg, C 80 mg, D 10 mcg, E 10 mg, zinc 15 mg, copper 1.2 mcg and selenium 65 mcg from the day of enrolment until delivery. Supplementation with iron and folic acid was part of routine antenatal care and was therefo…	None	Not mentioned	Yes	The control group received placebo. Supplementation with iron and folic acid was part of routine antenatal care.	Stillbirths	4	564	7	542	0.55	0.16 - 1.89	Effectiveness	High loss to follow-up; compliance data obtained for only one-half of the women so did not permit assessment of a dose-response relationship.
		Kaestel, P et al. (Guinea-Bissau)	2005	European Journal of Clinical Nutrition 59: 1081 - 1089	January 2001 to October 2002	Guinea-Bissau	Bissau, the capital	Semiurban	Not given	Health centres	Yes, randomized	Yes, adequate	Double masked trial: participants and outcome assessors were blinded to the treatment assignment	Yes	Not a cluster RCT	Not a cluster RCT	10% - 20%	Not applicable	Not applicable	Not applicable	Not applicable	Not applicable	Yes		All women < 37 weeks pregnant attending antenatal care as well as women identified through Bandim Health Project's monthly surveillance at their homes	The intervention group consisted of two arms: 1. Multimicronutrient tablet containing one RDA of 15 micronutrients and 2. Multimicronutrients containing two RDA of 15 micronutrients except for iron which was kept at one RDA.	None - see comments	The study sample covered 87% of the total number of registered deliveries in the study area	No	The comparison group received the conventional prenatal iron-folic acid supplement	Stillbirths	Generic inverse variance				0.49	0.27 - 0.89	Efficacy	A relatively high proportion of women for whom the valid birthweight data was not obtained. These women were primarily those delivering at home or having stillbirths. However, the proportion of women giving birth at home did not differ between groups	All women received an impregnated bed net at inclusion and were provided weekly anti-malarial prophylaxis with chloroquine phosphate (300 mg base) throughout pregnancy. Women with more than 10 parasites per 200 leucocytes at inclusion were also offered anti-malarial treatment with chloroquine. Women with severe anemia (hemoglobin < 70 g/l) received 60 mg iron per day in addition to their respecti…
		Osrin D, et al.	2005	Lancet; 365: 955-62	2002 - 2004	Nepal	Dhanusha district in the southern plains. Janakpur is the district municipality.	Mixed (urban population forms 11% of the district)	NMR = 39/1000 live births, PMR = 47/1000 births, hospital-based figures for LBW: 27% (an underestimate), LBW: 40% in a southern rural population	Antenatal clinic at Janakpur zonal hospital	Double-blind, randomized controlled trial	Yes, adequate	Double-blind trial	Yes	Not a cluster RCT	Not a cluster RCT	Less than 5%	Not applicable	Not applicable	Not applicable	Not applicable	Not applicable	Yes		Pregnant women up to 20 completed weeks of gestation attending a designated antenatal clinic at Janakpur zonal hospital.	The intervention group received multiple micronutrient tablets containing vitamin A 800 µg, vitamin E 10 mg, vitamin D 5 µg, B1 1.4 mg, B2 1.4 ng, niacin 18 mg, B6 1.9 mg, B12 2.6 µg, folic acid 400 µg, vitamin C 70 mg, iron 30 mg, zinc 15 mg, copper 2 mg, selenium 65 µg, and iodine 150 µg.	There were 2 prespecified deviations from the protocol: if a participant's enrolment blood hemoglobin concentration was less than 70 g/L, she was given an extra 60 mg of iron daily, anthelmintic treatment, and her hemoglobin was rechecked after 1 month; and if a participant described night blindness at any time, she was given 2000 µg of vitamin A daily and referred for medical follow up.	Not mentioned	No	The controls received iron 60 mg and folic acid 400 µg	Stillbirths	15	571	18	568	0.83	0.42 - 1.64	Effectiveness	None in particular
		Bhutta ZA, et al.	2009	Food and Nutrition Bulletin	Not mentioned	Pakistan	Urban population (Bilal Colony, Karachi) and villages of Kot Diji district (rural Sindh)	Urban and rural	Prevalence of LBW ranging from 18-40%. Iron deficiency anemia = 65%	Community-based	Yes, randomized	Not an issue since cluster randomized trial	Double blind	Not mentioned	Yes	28 clusters (16 rural and 12 urban)	Attrition: 16.53%	Not applicable	Not applicable	Not applicable	Not applicable	Not applicable	Yes		Women of reproductive age group who became pregnant or those with confirmed pregnancy < 16 weeks	The intervention group received UNIMMAP formulation consisting of 30 mg iron, 400 µg folic acid, 800 µg retinol, 200 IU vitamin D, 10 mg vitamin E, 70 mg ascorbic acid, 1.4 mg vitamin B1, 18 mg niacin, 1.9 mg vitamin B6, 2.6 µg vitamin B12, 15 mg zinc, 2 mg copper, 65 µg selenium, and 150 µg iodine	None	1	No	The control group received only iron 60 mg and folic acid 400 µg	Stillbirths	50	1148	48	1230	0.87	0.59 - 1.28	Effectiveness	None mentioned
		Ramakrishnan U, et al.	2003	Am J Clin Nutr 77: 720-5	1997 - 2000	Mexico	Near the city of Cuernavaca in Morelos, Mexico	Semirural	Not given	Community	Yes, randomized	Yes, adequate	The participants, providers and the outcome assessors were blinded to the treatment assignment	Yes	Not a cluster RCT	Not a cluster RCT	217/873 original randomized pregnancies were lost to follow up (more than 20%)	Not applicable	Not applicable	Not applicable	Not applicable	Not applicable	Yes		Pregnant women who were less than 13 weeks' gestation, were not receiving multiple-micronutrient supplementation and who agreed to participate in the study	The intervention group received multiple micronutrient tablets that included the following vitamins and minerals: iron 60 mg as ferrous sulphate, folic acid 215 µg, vitamin A 2150 IU, vitamin D3 309 IU, vitamin E 5.73 IU, thiamin 0.93 mg, riboflavin 1.87 mg, niacin 15.5 mg, vitamin B6 1.94 mg, vitamin B12 2.04 µg, vitamin C 66.5 mg, zinc 12.9 mg, magnesium 252 mg from recruitment 6 days a week un…	None	Not mentioned	No	The controls were given iron only tablets with 60 mg of iron as iron sulphate from recruitment 6 days a week until delivery	Stillbirths	5	323	4	322	1.24	0.34 - 4.52	Efficacy	High loss to follow-up; the study had inadequate power to detect a reduction of 50% in LBW, IUGR, intrauterine stunting (IUS) and prematurity
		Roberfroid D, et al.	2008	Am J Clin Nutr; 88: 1330-40	March 2004 to October 2006	Burkina Faso	Hounde health district (southwest of Burkina Faso)	Rural	In Burkina Faso, it is estimated that 19% of all live births in 1999 - 2005 were LBW; the incidence of LBW in term infants was ≈ 17% at the District Hospital in 2000 - 2001	Community-based	Yes, factorial randomized	Yes, adequate	Double-blind	Yes	Not a cluster RCT	Not a cluster RCT	Attrition: 9.4% and 10.3% in intervention and placebo groups respectively	Not applicable	Not applicable	Not applicable	Not applicable	Not applicable	No	Later study	Every woman of childbearing age identified through a community-based census that became pregnant	The multiple micronutrient tablet was composed of the following: vitamin A 800 µg, D 200 IU, E 10 mg, B1 1.4 mg, B2 1.4 mg, niacin 18 mg, folic acid 400 µg, vitamin B6 1.9 mg, B12 2.6 µg, C 70 mg, zinc 15 mg, iron 30 mg, copper 2 mg, selenium 65 µg and iodine 150 µg daily until 3 months after delivery. It contained less iron than iron and folic acid supplement (IFA) because vitamin C, vitamin A, …	Participants were also randomly assigned to receive either the malaria chemoprophylaxis recommended by health authorities (300 mg chloroquine/wk) or intermittent preventive treatment (1500 mg sulfadoxine and 75 mg pyrimethamine once in the second and third trimester)	1	No	The control group received 60 mg iron and 400 µg folic acid	Stillbirths	18	632	8	628	2.23	0.97 - 5.13	Efficacy	15% missing data at birth despite the very tight follow-up system. However, a validity check by multiple imputations of missing data confirmed that the results of this study were robust	In case of maternal illness, appropriate treatments were provided according to national guidelines. Severely anemic women (Hb < 70 g/L, without dyspnea) received ferrous sulphate (200 mg) + folic acid (0.25 mg) twice daily, for 3 mo, regardless of their allocation group. All participants also received 400 mg albendazole in the second and third trimesters. If malaria occurred despite chemoprophyla…
		SUMMIT	2008	Lancet 371: 215-27	Enrolment between July 1, 2001, and April 1, 2004	Indonesia	Island of Lombok, Nusa Tenggara Barat Province	Mixed	IMR = 89/1000 live births, MMR = 400 - 890 per 100 000 live births, wasting (BMI < 18.5) and anemia (Hb < 110 g/L) for women of reproductive age group was 15% and 29%, respectively	Village health centers and community health centers	Cluster-randomized trial	Yes, allocation concealment not an issue since a cRCT	Double-blind	Yes	Yes, results adjusted for clustering	262 clusters	5.7% attrition in intervention vs. 5.5% in the control group	Not applicable	Not applicable	Not applicable	Not applicable	Not applicable	No	Later study	Pregnant women of any gestational age assessed by physical exam and reported LMP	Multiple micronutrient consisting of iron 30 mg, folic acid 400 µg, vitamin A 800 µg, D 200 IU, E 10 mg, C 70 mg, B1 1.4 mg, B6 1.9 mg, B12 2.6 µg, zinc 15 mg, copper 2 mg, selenium 65 µg, iodine 150 µg and niacin 18 mg throughout pregnancy until 90 days post partum	None	1	No	The placebo group received iron 30 mg and folic acid 400 µg throughout pregnancy until 90 days post partum	Stillbirths	245	14618	268	14321	0.9	0.75 - 1.08	Effectiveness	Can not disaggregate the effects of prepartum vs. post-partum MMN consumption and also can not see the difference in outcomes among women enrolled in the first/second trimester vs. the last trimester. The effect on birth weight may be underestimated because of the high proportion of educated women and deliveries at a birthing center in this study
		Sunawang et al.		In press	May 2001 through August 2003	Indonesia	Indramayu District in the West Java Province	Unclear	Not mentioned	Community-based: two sub-districts of the Indramayu District	Yes, cluster randomized trial	Allocation concealment not an issue	Single-blind design	Not mentioned	Not mentioned	80 clusters	Attrition: 11%	Not applicable	Not applicable	Not applicable	Not applicable	Not applicable	No	Later study	All pregnant women identified through intensive surveillance in the clusters	The MMN supplements contained the recommended daily allowance of 15 micronutrients according to the UNICEF/UNU/WHO recommended formula, including 30 mg of ferrous fumarate from the time of enrollment at 12-20 weeks gestation and continued up to 30 days postpartum	None	1	No	The comparison group received 60 mg elemental iron as ferrous sulphate and 0.25 mg folic acid from the time of enrollment at 12-20 weeks gestation and continued up to 30 days postpartum	Stillbirths	8	432	8	411	0.9	0.35 - 2.31	Efficacy	The rate of LBW in the population of this study was lower than that found in other Indonesian studies, and therefore the calculated sample size was inadequate to detect significant differences. There was an absence of a placebo control group. The study was not powered to detect the impact of MMN supplement in reducing fetal loss and neonatal death compared to iron folic acid
		Tofail F, et al.	2008	Am J Clin Nutr; 87: 704-11	Not mentioned	Bangladesh	Matlab, a poor rural subdistrict in the east central plain of Bangladesh	Rural	Not mentioned	Community-based	Yes, randomized	Yes, probably done	Double blind	Not mentioned	Not a cluster RCT	Not a cluster RCT	5 - 10%	Not applicable	Not applicable	Not applicable	Not applicable	Not applicable	No	Later study	All pregnant women within 6 - 8 weeks of conception	The intervention group received multiple micronutrient containing vitamin A 800 mcg, D 200 IU, E 10 mcg, C 70 mg, B1 1.4 mg, B2 1.4 mg, niacin 18 mg, B6 1.9 mg, B12 2.6 mg, folic acid 400 mcg, iron 30 mg, zinc 15 mg, copper 2 mg, selenium 65 mcg and iodine 150 mcg.	Food supplementation	1	No	The comparison group comprised of two arms: Fe 60 mg + 400 mcg folate and Fe 30 mg + 400 mcg folate	Stillbirths	Generic inverse variance				1	0.57 - 1.75	Effectiveness	There was food supplementation also going on in this study
		Zagre NM, et al.	2007	Food and Nutrition Bulletin; 28(3): 317-327	Recruitment between January 2004 and March 2005	Niger	Mayahi District, north of the administrative region of Maradi	Rural	Not mentioned	17 Integrated Health Centers and 78 villages of Mayahi District	Cluster-randomized trial	Allocation concealment not an issue	Double-blind trial: participants, caregivers and outcome assessors blinded to the treatment assignment	Yes	Not mentioned	Not mentioned	Attrition: 18%	Not applicable	Not applicable	Not applicable	Not applicable	Not applicable	No	Later study	Women residing in target villages and experiencing amenorrhea for less than 12 weeks. Women with night blindness and/or signs of severe anemia were excluded	Micronutrient group received vitamin A 800 µg, D 200 IU, E 10 mg, C 70 mg, B1 1.4 mg, B2 1.4 mg, B3 18 mg, B6 1.9 mg, B12 2.6 mg, folic acid 400 µg, iron 30 mg, zinc 15 mg, copper 2 mg, selenium 65 µg, iodine 150 µg	None	Not mentioned	No	The control group received iron and folic acid	Stillbirths	Generic inverse variance				1.18	0.80 - 1.74	Effectiveness	The external validity of the study is limited to a context where effective prenatal care is provided
		Zeng L, et al.	2008	BMJ; 337: a2001	August 2002 to February 2006	China	Two poor counties in Shaanxi Province of north west China	Rural	Low birth rate = 13%, women with severe anemia (Hb < 110 g/L) in the third trimester = 57%	Community-based	Yes, cluster randomized trial	Allocation concealment not an issue	Double-blind: participants, caregivers and outcome assessors were blinded to the treatment assignment	Yes	Yes	531 clusters	Attrition: 18.7% in multiple micronutrient group, 18.2% in iron-folic acid group	Not applicable	Not applicable	Not applicable	Not applicable	Not applicable	No	Later study	Pregnant women less than 28 weeks of gestation	The multiple micronutrient supplement consisted of 30 mg iron, 400 µg folate, 15.0 mg zinc, 2.0 mg copper, 65.0 µg selenium, 150 µg iodine, 800 µg vitamin A, 1.4 mg vitamin B1, 1.4 mg vitamin B2, 1.9 mg vitamin B6, 2.6 µg vitamin B12, 5.0 µg vitamin D, 70 mg vitamin C, 10 mg vitamin E, and 18.0 mg niacin	None	1	No	The comparison group received 60 mg iron and 400 µg folic acid	Stillbirths	63	1532	47	1546	1.35	0.93 - 1.96	Effectiveness	Low power of the study to detect changes in the prevalence of low birth weight, preterm delivery, and perinatal mortality
	Peri-conceptional Folic Acid supplementation/fortification for prevention of NTDs
	Incidence of NTDs	Czeizal et al.	2004	Birth Defects Research (Part A) 70:853–861 (2004)	May 1, 1993 and April 30, 1996	Hungary	Hungarian Periconceptional Service	Urban	Not mentioned	Community-based	cohort-controlled trial (CCT) design	Not applicable	cohort-controlled trial (CCT) design		Not applicable	Not applicable	0.18	Yes	Not applicable	Yes	Not applicable	Not applicable	NO	Later study	3056 eligible couples (not sterile, i.e., can achieve a conception within one year, not currently pregnant, voluntary participation with HPS) and 3056 unsumplemented pregnant women who are between 8th- 12th week of gestation	“vitamin” tablets (Elevit Prenatal [Roche, Switzerland], which was used in the Hungarian RCT)for 1 month before planned conception and were asked to stop taking any other vitamins.	None	2560 (82%) were fully supplemented and 563 (18%) were partially supplemented	Yes	Unsupplemented cohort used no multivitamin and/or folic acid during the periconceptional period and before the first visit.	Recurrent NTD incidence	1	3056	9	3056	0.11	0.01-0.88		1.there was an obvious asymmetry in the morbidity of mothers, mainly in the degree of previous unsuccessful pregnancy outcomes. This explains the higher occurrence of intermediate and late miscarriages, and the two-fold higher number of previous fetal defects diagnosed prenatally in the supplemented cohort. 2.Supplemented women were probably more likely to have planned the study pregnancy than th…
		Kerke et al.	1992	Arch Dis Child 1992 67: 1442-1446	December 1981 till April 1990	Ireland	12 Irish hospitals (4 in Dublin),	Urban	Not mentioned	Community-based	Yes, block randomization	Yes	Initially Double blinded, but was later partially blinded d/t withdrawal of pharmaceutical support	Yes	Not applicable	Not applicable	0.008	Not applicable	Not applicable	Not applicable	Not applicable	Not applicable	Yes	Not applicable	Women who had had a baby with a NTD and who were not pregnant when contacted by the study team but were planning a further pregnancy were eligible for inclusion.	Tablets for women in folic acid group contained 0-36 mg of folic acid (0- 12 mg/tablet). Tablets in the multivitamin groups provided daily doses of vitamin A 4000 IU, calciferol 400 IU, thiamine hydrochloride 1-5 mg, riboflavine 1-5 mg, pyridoxine hydrochloride 1 mg, nicotinamide 15 mg, ascorbic acid 40 mg, calcium phosphate 480 mg, and ferrous sulphate 252 mg.	Multivitamins	Not mentioned	Yes	Women who entered the trial gave verbal consent and were randomly allocated to one of three treatment groups: folic acid only (group F), multivitamins excluding folic acid (group M), and folic acid plus multivitamins (group FM).	Recurrent NTD incidence	0	169	1	88	0.17	0.01-4.24
		MRC	1991	The Lancet;1991: vol 338	1983-1991	International (seven countries)	17 centres in UK and 16 in other countries	Urban	Not mentioned	Community-based	Yes, randomized	Yes	Double blinded	Yes	Not applicable	Not applicable	Exclusion +Attrition 34%	Not applicable	Not applicable	Not applicable	Not applicable	Not applicable	Yes	Not applicable	Women with previous pregnancy with NTD planning another preg. And not taking vitamin supp	4 mg Folic Acid to group A and vitamins A 4000U, D 400 U,B1 1.5 mg, B2 1.5 mg, B6 1.0 mg, C 40 mg, nicotinamide 15 mg to group B	Multivitamins		Yes	Control group received 120 mg dried ferrous sulphate and 240 mg Calcium phosphatetablets for 12 weeks	Primary NTD incidence	6	593	21	602	0.29	0.12-0.71
		Laurence et al.	1989	Br Med J (Clin Res Ed) 1981, 282(6275):1509-1511.	1954-1969	UK	Glamorgan and Gwent	Urban	Not mentioned	Community-based	Yes, randomized	Unclear	Double blind	Yes	Not applicable	Not applicable	Not mentioned	Not applicable	Not applicable	Not applicable	Not applicable	Not applicable	Yes	Not applicable	Women identified from multiple record sources as having had a child with an NTD (defined here as anencephalus, encephalocele or spina bifida cystica) between 1954 and 1969, and were < 35 years (n = 905) were invited to participate if they had a poor diet.	Twice daily tablet of folic acid 2 mg from the time of stopping contraception.	No	27 % non complier	Yes	Placebo	Recurrent NTD incidence	2	60	4	51	0.0043	0.08-2.23
		Czeizel et al.	1994	BMJ 1993;306:1645-8	1984-April 1992	Hungary	Hospital	Urban	Not mentioned	Community-based	Yes, randomized	Unclear	Unclear	Yes	Not applicable	Not applicable	0.008	Not applicable	Not applicable	Not applicable	Not applicable	Not applicable	Yes	Not applicable	Women attending the Hungarian Optimal Family Planning programme (HOFPP) not currently pregnant, and who conceived within 12 months of ceasing contraception. < 35 years, and not to have had a prior pregnancy except a prior induced abortion.	Intervention was provided 28 days before conception to, continuing until at least the second missed menstrual period. The multivitamin with folate (MF) included 6000 IU vitamin A, 1.6 mg vitamin B1, 1.8 mg vitamin B2, 2.6 mg vitamin B6, 4.0 mcg vitamin B12, 100 mg vitamin C, 500 IU vitamin D, 15 mg vitamin E, 19 mg nicotinamide, 10 mg Ca-pantothenate, 0.2 mg biotin, 0.8 mg folic acid, 125 mg calc…	Multivitamins		Yes	Placebo	Primary NTD incidence	0	2471	6	2391	0.07	0.00-1.32
		Berry et al	1999	N Engl J Med 1999, 341(20):1485-1490.	1993-1996	China	Hebei, Zhejiang and Jiangsu	Mixed	Not mentioned	Community-based	No, Cohort study	Not applicable	Not applicable	Not applicable	Not applicable	Not applicable	0.1	Yes	Not applicable	Yes	No	Not applicable	no	Cohort study	All pregnant women and women who were preparing for marriage registered with a pregnancy-monitoring system that serves as the principal record of prenatal care and delivery in all three provinces.	400 μg of folic acid	No	0.61	Yes	Control	Primary NTD incidence	Generic inverse variance				0.45	0.32-0.62
		Milunsky et al	1989	JAMA 1989, 262(20):2847-2852.	1984-1987	USA	Boston	Urban	Not mentioned	Community-based	No, Cohort study	Not applicable	Not applicable	Not applicable	Not applicable	Not applicable	0.003	Yes	Not applicable	Yes	No	Not applicable	no	Cohort study	All women in the study were identi¬ fied and recruited when they had either a maternal serum a-fetoprotein (MSAFP) screen or an amniocentesis. They were receiving prenatal care and routine MSAFP screening in the prac¬ tices of over 100 participating obstetri¬ cians; 96% of the pregnancies were be¬ tween 15 and 20 weeks' gestation.	No intervetion	Not applicable	Not applicable	Not applicable	Not applicable	Primary NTD incidence	10	10713	39	11944	0.29	0.14-0.57
		Bower et al	2009	Birth Defects Research (Part A) 85:269–273 (2009)	1980-2006	Australia	Westren australia	Mixed	Not mentioned	Retreospective review of data registery	No, Before and after study	Not applicable	Not applicable	Not applicable	Not applicable	Not applicable	Not applicable	No	Not applicable	Not applicable	Not applicable	Yes	No	Not an RCT	General population	Folic acid fortification of food	No	Vomuntary fortification	Yes	Prefortification	Primary NTD incidence	Generic inverse variance				0.74	0.64-0.85
		Calvo et al	2008	Arch Argent Pediatr 2008, 106(6):492-498	2000-2005	Argentina	Argentina	Mixed	Not mentioned	Retreospective review of data registery	No, Before and after study	Not applicable	Not applicable	Not applicable	Not applicable	Not applicable	Not applicable	No	Not applicable	Not applicable	Not applicable	Yes	No	Not an RCT	General population	Folic acid fortification of food	No	Mandatory fortification	Yes	Prefortification	Primary NTD incidence	Generic inverse variance				0.55	0.48-0.63
		Lopez et al	2005	Am J Med Genet A 2005, 135(2):120-125	1982-2002	Chile	Chile	Mixed	Not mentioned	Retreospective review of data registery	No, Before and after study	Not applicable	Not applicable	Not applicable	Not applicable	Not applicable	Not applicable	No	Not applicable	Not applicable	Not applicable	Yes	No	Not an RCT	General population	Folic acid fortification of food	No	Mandatory fortification	Yes	Prefortification	Primary NTD incidence	90	113268	585	352127	0.48	0.38-0.60
		Chen et al	2008	Birth Defects Res A Clin Mol Teratol 2008, 82(8):547-552.	1989-2003	USA	California	Mixed	Not mentioned	Retreospective review of data registery	No, Before and after study	Not applicable	Not applicable	Not applicable	Not applicable	Not applicable	Not applicable	No	Not applicable	Not applicable	Not applicable	Yes	No	Not an RCT	General population	Folic acid fortification of food	No	Mandatory fortification	Yes	Prefortification	Primary NTD incidence	225	409269	395	477716	0.85	0.72-1.00
		De Wals et al	2003	Birth Defects Res A Clin Mol Teratol 2003, 67(11):919-923.	1992-2000	Canada	Quebec	Mixed	Not mentioned	Retreospective review of data registery	No, Before and after study	Not applicable	Not applicable	Not applicable	Not applicable	Not applicable	Not applicable	No	Not applicable	Not applicable	Not applicable	Yes	No	Not an RCT	General population	Folic acid fortification of food	No	Mandatory fortification	Yes	Prefortification	Primary NTD incidence	285	222190	1010	533451	0.68	0.59-0.77
		De Wals et al	2007	N Engl J Med 2007, 357(2):135-142.	1993-2002	Canada	Newfoundland and Labrador, Nova Scotia, Prince Edward Island, Quebec, Manitoba, Alberta, British Columbia,	Mixed	Not mentioned	Retreospective review of data registery	No, Before and after study	Not applicable	Not applicable	Not applicable	Not applicable	Not applicable	Not applicable	No	Not applicable	Not applicable	Not applicable	Yes	No	Not an RCT	General population	Folic acid fortification of food	No	Mandatory fortification	Yes	Prefortification	Primary NTD incidence	Generic inverse variance				0.54	0.490.60
		Liu et al	2004	BMC Pregnancy Childbirth 2004, 4(1):20.	1991-2001	Canada	Newfoundland	Mixed	Not mentioned	Population survey	No, Before and after study	Not applicable	Not applicable	Not applicable	Not applicable	Not applicable	Not applicable	No	Not applicable	Not applicable	Not applicable	Yes	No	Not an RCT	General population	Folic acid fortification of food	No	Mandatory fortification	Yes	Prefortification	Primary NTD incidence	19	19816	193	44303	0.22	0.14-0.35
		Persad et al	2002	CMAJ 2002, 167(3):241-245.	1991-1997	Canada	Nova Scotia	Mixed	Not mentioned	Retreospective review of data registery	No, Before and after study	Not applicable	Not applicable	Not applicable	Not applicable	Not applicable	Not applicable	No	Not applicable	Not applicable	Not applicable	Yes	No	Not an RCT	General population	Folic acid fortification of food	No	Mandatory fortification	Yes	Prefortification	Primary NTD incidence	34	29010	120	47064	0.46	0.31-0.67
		Ray et al	2002	Lancet 2002, 360(9350):2047-2048.	1994-2000	Canada	Canada	Mixed	Not mentioned	Retreospective review of data registery	No, Before and after study	Not applicable	Not applicable	Not applicable	Not applicable	Not applicable	Not applicable	No	Not applicable	Not applicable	Not applicable	Yes	No	Not an RCT	General population	Folic acid fortification of food	No	Mandatory fortification	Yes	Prefortification	Primary NTD incidence	69	117986	248	218977	0.52	0.4-0.67
		Sayed et al	2008	Birth Defects Res A Clin Mol Teratol 2008, 82(4):211-216.	2001-2006	South Africa	Various provines	Mixed	Not mentioned	Retreospective review of data registery	No, Before and after study	Not applicable	Not applicable	Not applicable	Not applicable	Not applicable	Not applicable	No	Not applicable	Not applicable	Not applicable	Yes	No	Not an RCT	General population	Folic acid fortification of food	No	Mandatory fortification	Yes	Prefortification	Primary NTD incidence	45	46021	112	79587	0.69	0.49-0.98
		Williams et al	2002	Teratology 2002, 66(1):33-39.	1995-1999	USA	(Arkansas, California, Colorado, Delaware, Florida, Georgia, Hawaii, Iowa, Illinois, Kentucky, Maryland, Michigan, Missouri, North Carolina, New Jersey, New York, Oklahoma, Puerto Rico, South Carolina, Texas, Utah, Washington, West Virginia, and Wisconsin).	Mixed	Not mentioned	Retreospective review of data registery	No, Before and after study	Not applicable	Not applicable	Not applicable	Not applicable	Not applicable	Not applicable	No	Not applicable	Not applicable	Not applicable	Yes	No	Not an RCT	General population	Folic acid fortification of food	No	Mandatory fortification	Yes	Prefortification	Primary NTD incidence	1344	117986	248	218997	0.74	0.69-0.79
